# Supplementary material for: Factors Associated with the COVID-19 Vaccination Status of Higher Education Students: Results of an Online Cross-Sectional Survey at Six Universities in Southwestern Germany
Source: MDPI journal article supplement (doi:10.3390/vaccines10091433), 2022-08-30
Supplement: s1 [file s1]

## Supplementary Material

**Table S1.** Univariate binary logistic regression analysis: possible explanatory variables (factors) and the outcome “COVID-19 vaccination status” (not vaccinated against COVID-19 = 0 / received at least one dose of COVID-19 vaccine = 1)

| Explanatory Variables (Factors)                                                                             |                                                                                                                    | Regression-<br>coefficient B | Wald<br>statistics | p-value          | Odds<br>Ratio<br>(OR) | 95% confidence<br>interval for OR |                |
|-------------------------------------------------------------------------------------------------------------|--------------------------------------------------------------------------------------------------------------------|------------------------------|--------------------|------------------|-----------------------|-----------------------------------|----------------|
| Variable Group<br>from the<br>questionnaire                                                                 | Variables *                                                                                                        |                              |                    |                  |                       | Lower<br>limit                    | Upper<br>limit |
| (I)<br>Individual<br>variables (socio-<br>demographic,<br>personal and<br>study-related<br>characteristics) | Age                                                                                                                | -0.018                       | 3.360              | 0.067            | 0.982                 | 0.963                             | 1.001          |
|                                                                                                             | Gender (male/female)                                                                                               | -0.035                       | 0.130              | 0.718            | 0.966                 | 0.799                             | 1.167          |
|                                                                                                             | Affiliation to risk group (0/1)                                                                                    | 0.097                        | 0.361              | 0.548            | 1.101                 | 0.804                             | 1.509          |
|                                                                                                             | German Nationality (0/1)                                                                                           | 0.478                        | 7.076              | <b>0.008</b>     | 1.613                 | 1.134                             | 2.293          |
|                                                                                                             | Employment (0/1)                                                                                                   | 0.221                        | 5.529              | <b>0.019</b>     | 1.247                 | 1.037                             | 1.499          |
|                                                                                                             | Health professionals within<br>household (0/1)                                                                     | -0.217                       | 4.500              | <b>0.034</b>     | 0.805                 | 0.659                             | 0.984          |
|                                                                                                             | Relationship (0/1)                                                                                                 | -0.284                       | 9.566              | <b>0.002</b>     | 0.753                 | 0.629                             | 0.901          |
|                                                                                                             | Trait extraversion <sup>1</sup>                                                                                    | -0.085                       | 3.877              | <b>0.049</b>     | 0.919                 | 0.845                             | 1.000          |
|                                                                                                             | Trait agreeableness <sup>1</sup>                                                                                   | 0.025                        | 0.201              | 0.654            | 1.025                 | 0.921                             | 1.141          |
|                                                                                                             | Trait conscientiousness <sup>1</sup>                                                                               | -0.415                       | 57.711             | <b>&lt;0.001</b> | 0.661                 | 0.591                             | 0.739          |
|                                                                                                             | Trait neuroticism <sup>1</sup>                                                                                     | 0.253                        | 30.127             | <b>&lt;0.001</b> | 1.287                 | 1.176                             | 1.409          |
|                                                                                                             | Trait openness to experiences <sup>1</sup>                                                                         | -0.100                       | 4.943              | <b>0.026</b>     | 0.905                 | 0.829                             | 0.988          |
|                                                                                                             | Higher education institution<br>(application-oriented / research-<br>oriented)                                     | 0.001                        | 0.000              | 0.991            | 1.001                 | 0.776                             | 1.292          |
|                                                                                                             | Healthcare university curriculum<br>(0/1)                                                                          | 0.579                        | 10.676             | <b>0.001</b>     | 1.785                 | 1.261                             | 2.527          |
| (II)<br>Perception of<br>SARS-CoV-2 in<br>general <sup>2</sup>                                              | Disease perception                                                                                                 | 0.738                        | 384.151            | <b>&lt;0.001</b> | 2.091                 | 1.942                             | 2.251          |
|                                                                                                             | Affective risk perception                                                                                          | 0.815                        | 479.489            | <b>&lt;0.001</b> | 2.258                 | 2.099                             | 2.429          |
|                                                                                                             | Perception of the outbreak as a<br>media-hype <sup>+</sup>                                                         | -1.033                       | 564.087            | <b>&lt;0.001</b> | 0.356                 | 0.327                             | 0.388          |
|                                                                                                             | Perceived personal susceptibility<br>to contract SARS-CoV-2 <sup>+</sup>                                           | 0.247                        | 54.104             | <b>&lt;0.001</b> | 1.280                 | 1.199                             | 1.368          |
|                                                                                                             | Expected severity of the disease <sup>+</sup>                                                                      | 0.553                        | 202.391            | <b>&lt;0.001</b> | 1.738                 | 1.611                             | 1.876          |
| (III)<br>Attitude toward<br>health and safety<br>measures to<br>prevent SARS-<br>CoV-2 infections           | Attitude toward behavioral<br>preventive measures in the study<br>environment                                      | 1.050                        | 240.600            | <b>&lt;0.001</b> | 2.858                 | 2.503                             | 3.264          |
|                                                                                                             | Attitude toward structural<br>preventive measures in the study<br>environment                                      | 0.975                        | 263.585            | <b>&lt;0.001</b> | 2.643                 | 2.349                             | 2.975          |
| (IV)<br>Impact of COVID-<br>19 on the personal<br>environment                                               | Perceived probability to contract<br>COVID-19 in private surrounding <sup>+</sup>                                  | 0.247                        | 62.003             | <b>&lt;0.001</b> | 1.281                 | 1.204                             | 1.362          |
|                                                                                                             | Perceived probability to contract<br>COVID-19 in study environment <sup>+</sup>                                    | 0.031                        | 1.259              | 0.262            | 1.031                 | 0.977                             | 1.088          |
|                                                                                                             | Readiness to perform SARS-CoV-2<br>rapid antigen tests <sup>+</sup>                                                | 0.397                        | 336.604            | <b>&lt;0.001</b> | 1.488                 | 1.426                             | 1.552          |
|                                                                                                             | Reactance regarding measures<br>taken to prevent SARS Cov-2<br>infections                                          | -0.641                       | 420.110            | <b>&lt;0.001</b> | 0.527                 | 0.496                             | 0.560          |
|                                                                                                             | COVID-specific resilience                                                                                          | -0.059                       | 2.835              | 0.092            | 0.942                 | 0.880                             | 1.010          |
|                                                                                                             | Positive assessment of fellow<br>students to adhere to the distance<br>rules in the course of studies <sup>+</sup> | -0.123                       | 21.749             | <b>&lt;0.001</b> | 0.885                 | 0.840                             | 0.931          |
|                                                                                                             |                                                                                                                    |                              |                    |                  |                       |                                   |                |

|                                                   |                                                                                                                                                |        |          |        |       |       |       |
|---------------------------------------------------|------------------------------------------------------------------------------------------------------------------------------------------------|--------|----------|--------|-------|-------|-------|
|                                                   | Positive assessment of fellow students to adhere to the hygiene rules in the course of studies <sup>†</sup>                                    | -0.003 | 0.014    | 0.905  | 0.997 | 0.942 | 1.054 |
| (V)<br>Variables relating to COVID-19 vaccination | Vaccinating against COVID-19 mainly helps to preserve my health. <sup>†2</sup>                                                                 | 0.803  | 872.118  | <0.001 | 2.233 | 2.117 | 2.355 |
|                                                   | Vaccinating against COVID-19 mainly helps to eliminate the disadvantages I have due to the pandemic. <sup>†2</sup>                             | 0.419  | 327.183  | <0.001 | 1.520 | 1.453 | 1.591 |
|                                                   | Vaccinating against COVID-19 primarily helps higher education institutions to eliminate the disadvantages caused by the pandemic. <sup>†</sup> | 0.652  | 664.437  | <0.001 | 1.920 | 1.827 | 2.018 |
|                                                   | I am completely confident that vaccination against COVID-19 is safe. <sup>†2,3</sup>                                                           | 1.007  | 1019.599 | <0.001 | 2.738 | 2.574 | 2.913 |
|                                                   | Vaccination against COVID-19 is unnecessary because COVID-19 is not a major threat. <sup>†2,3</sup>                                            | -0.892 | 911.358  | <0.001 | 0.410 | 0.387 | 0.434 |
|                                                   | Everyday stress prevents me from getting vaccinated against COVID-19. <sup>†2,3</sup>                                                          | -0.521 | 297.297  | <0.001 | 0.594 | 0.560 | 0.630 |
|                                                   | When I think about getting vaccinated against COVID-19, I weigh benefits and risks to make the best decision possible. <sup>†2,3</sup>         | -0.632 | 258.614  | <0.001 | 0.531 | 0.492 | 0.574 |
|                                                   | When everyone is vaccinated against COVID-19, I don't have to get vaccinated, too. <sup>†2,3</sup>                                             | -0.729 | 748.002  | <0.001 | 0.482 | 0.458 | 0.508 |
|                                                   | Vaccination allows us to return to routine life. <sup>†2</sup>                                                                                 | 0.846  | 932.675  | <0.001 | 2.331 | 2.208 | 2.461 |
|                                                   | Due to the COVID-19 vaccination, I can have more social contacts again. <sup>†2</sup>                                                          | 0.865  | 963.919  | <0.001 | 2.376 | 2.249 | 2.509 |
|                                                   | I contribute to the containment of the pandemic by vaccinating against COVID-19. <sup>†2</sup>                                                 | 0.952  | 1103.677 | <0.001 | 2.590 | 2.448 | 2.739 |

\* 0 = no; 1 = yes

<sup>†</sup> Measurement on 7-point Likert scale with range low to high

<sup>1</sup> Big-Five-Trait [51]; range 1-5 – low to high

<sup>2</sup> COSMO – COVID-19 Snapshot Monitoring [54]

<sup>3</sup> 5C psychological antecedents of vaccination [56] in relation to COVID-19 vaccination
